# Supplementary material
Source: publisher figshare collection journal article supplement (https://future-science-group.figshare.com/ndownloader/files/34557686)
Supplement: Supplementary file 1 [file 34557686]

Table 2: Demographics of the study population, on an intention-to-treat analysis

|  | All | Group ITT-GA | Group ITT-SP |
| --- | --- | --- | --- |
| n | 199 | 90 | 109 |
| Surgical Firm  A  B  C  D  E  F | 17 (9%)  19 (10%)  40 (20%)  34 (17%)  33 (17%)  57 (29%) | 8 (9%)  6 (7%)  16 (18%)  18 (20%)  18 (20%)  24 (27%) | 9 (8%)  13 (12%)  24 (22%)  16 (15%)  15 (14%)  32 (29%) |
| Age (years) | 68  [IQR: 62 - 70] | 67  [IQR: 60 - 70] | 68  [IQR: 64 - 71] |
| Sex (% female) | 128  (64%) | 56  (62%) | 72  (66%) |
| BMI | 34  [IQR: 30 - 38.5] | 33  [IQR: 29.5 - 37] | 35  [IQR: 30 - 39] |
| ASA I – II | 114  (57%) | 49  (54%) | 65  (60%) |
| S-LANSS > 12 | 25  (13%) | 12  (13%) | 13  (12%) |
| WOMAC® (median) | 41  [IQR: 30.5 - 53] | 41.5  [IQR: 29.75 - 53] | 40  [IQR: 31 - 52.5] |
| WOMAC®-Pain  (median) | 10  [IQR: 7 - 12] | 9  [IQR: 7 - 12] | 10  [IQR: 8 - 12] |
